# Supplementary material for: High-performance wide bandgap perovskite solar cells fabricated in ambient high-humidity conditions
Source: Royal Society of Chemistry journal article supplement (doi:10.1039/d1ma00432h), 2021-01-01
Supplement: d1ma00432h1.pdf [file d1ma00432h1.pdf]

## SUPPLEMENTARY INFORMATION

### High-performing Wide Bandgap Perovskite Solar Cells Fabricated in Ambient High-Humidity Conditions

Ugur Deneb Menda, Guilherme Ribeiro, Daniela Nunes, Tomás Calmeiro, Hugo Águas, Elvira Fortunato, Rodrigo Martins, Manuel J. Mendes

*i3N/CENIMAT, Department of Materials Science, Faculty of Science and Technology, Universidade NOVA de Lisboa and CEMOP/UNINOVA, Campus de Caparica, 2829- 516 Caparica, Portugal*

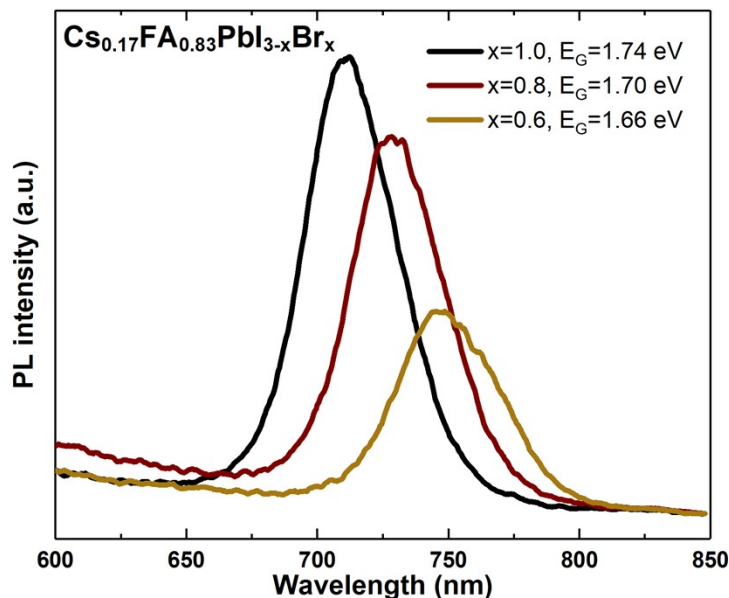

**Figure S1.** Photoluminescence (PL) spectra of the WBG perovskite ( $\text{Cs}_{0.17}\text{FA}_{0.83}\text{PbI}_{3-x}\text{Br}_x$ ) layers with unnormalized intensity.

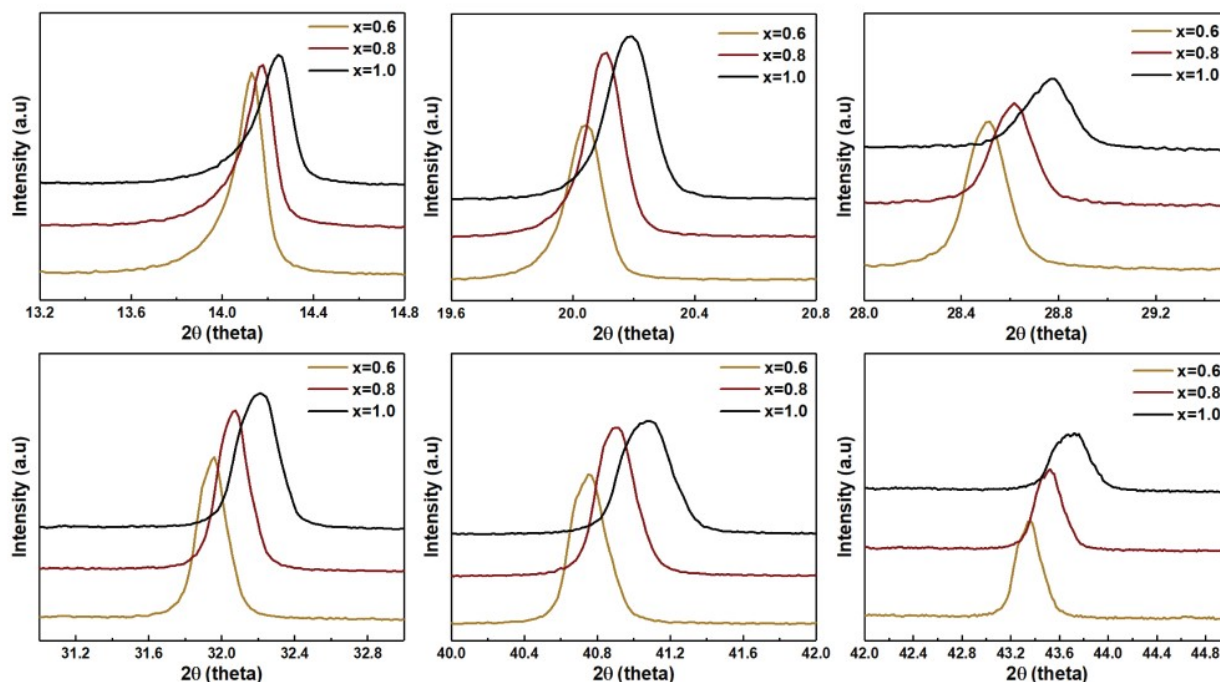

**Figure S2.** Details of the XRD peaks in Fig. 2d of the main article, of the  $\text{Cs}_{0.17}\text{FA}_{0.83}\text{PbI}_{3-x}\text{Br}_x$  layers with different  $x$  values, showing more clearly the shift of the characteristic peaks to larger scattering angles with the increment of the Br:I ratio. This occurs due to the contraction of the crystal lattice with higher bromide content.

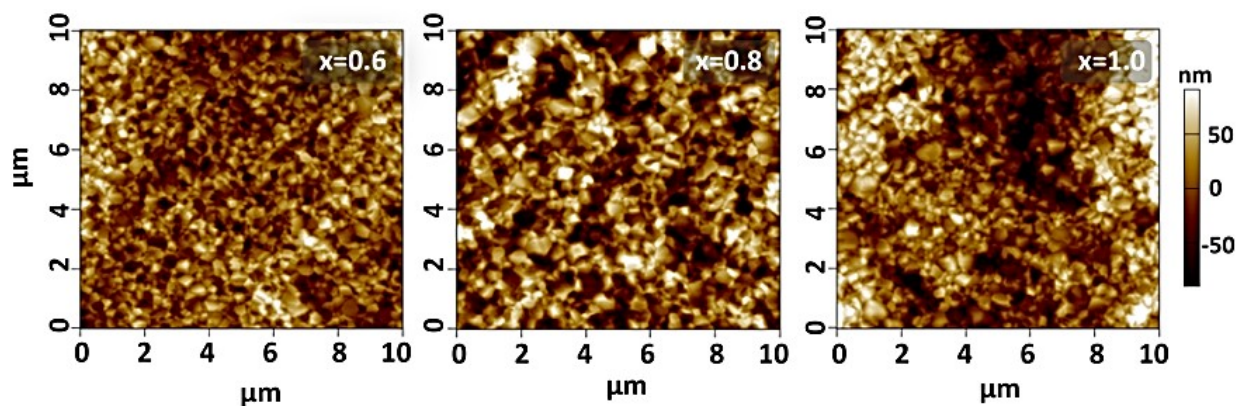

**Figure S3.** AFM images of  $\text{Cs}_{0.17}\text{FA}_{0.83}\text{PbI}_{3-x}\text{Br}_x$  WBG perovskite layers with different Br content.

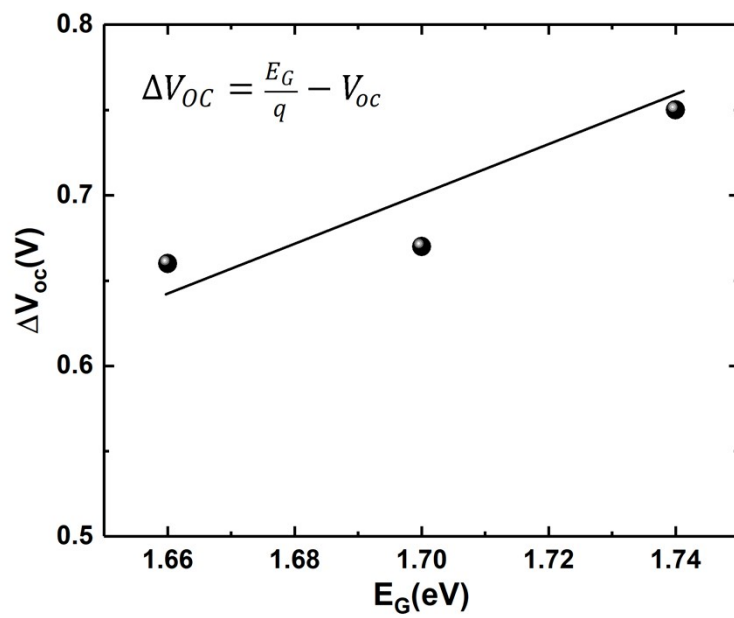

**Figure S4.** Open-circuit voltage,  $V_{oc}$ , deficit values of the WBG PSCs with the 3 different bandgaps,  $E_G$ .

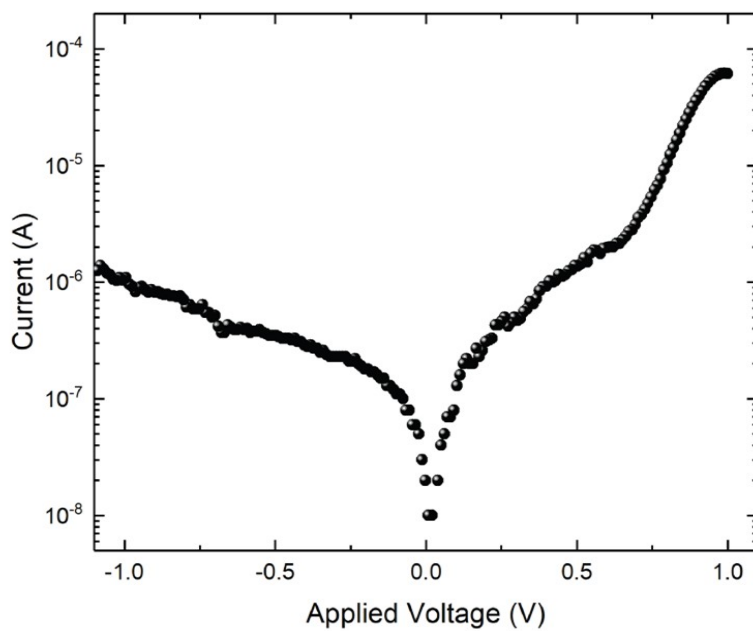

**Figure S5.** Dark I-V curve of the best performing solar cell with excess reverse leakage current.

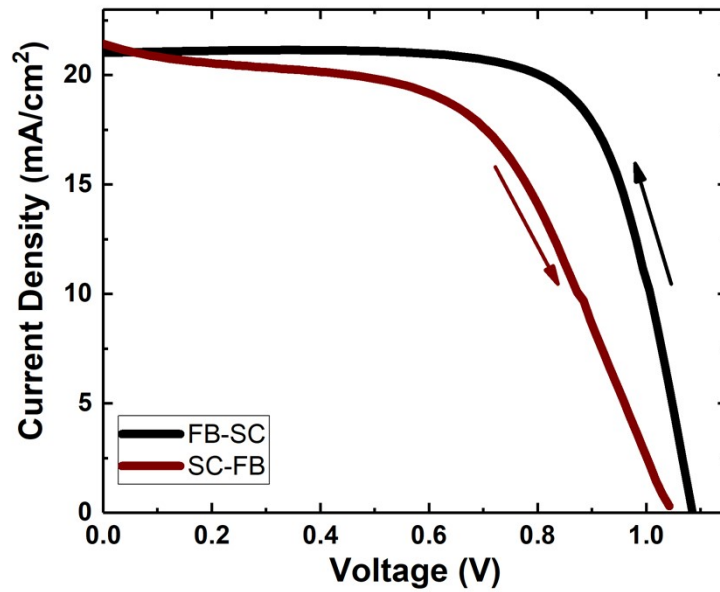

**Figure S6.** J-V curves in reverse scan (from Forward bias, FB, to Short Circuit, SC) and forward scan (from SC to FB). The plot shows a distinct hysteresis effect which is attributed to the mobile ions/ion-vacancies in the perovskite material [1,2]. This phenomenon is still being actively researched both on theoretical [3–5] and experimental [1,2] grounds, but the general consensus in the PSCs field is that the results comparison should focus in the reverse scan JVs of the best performing devices [5].

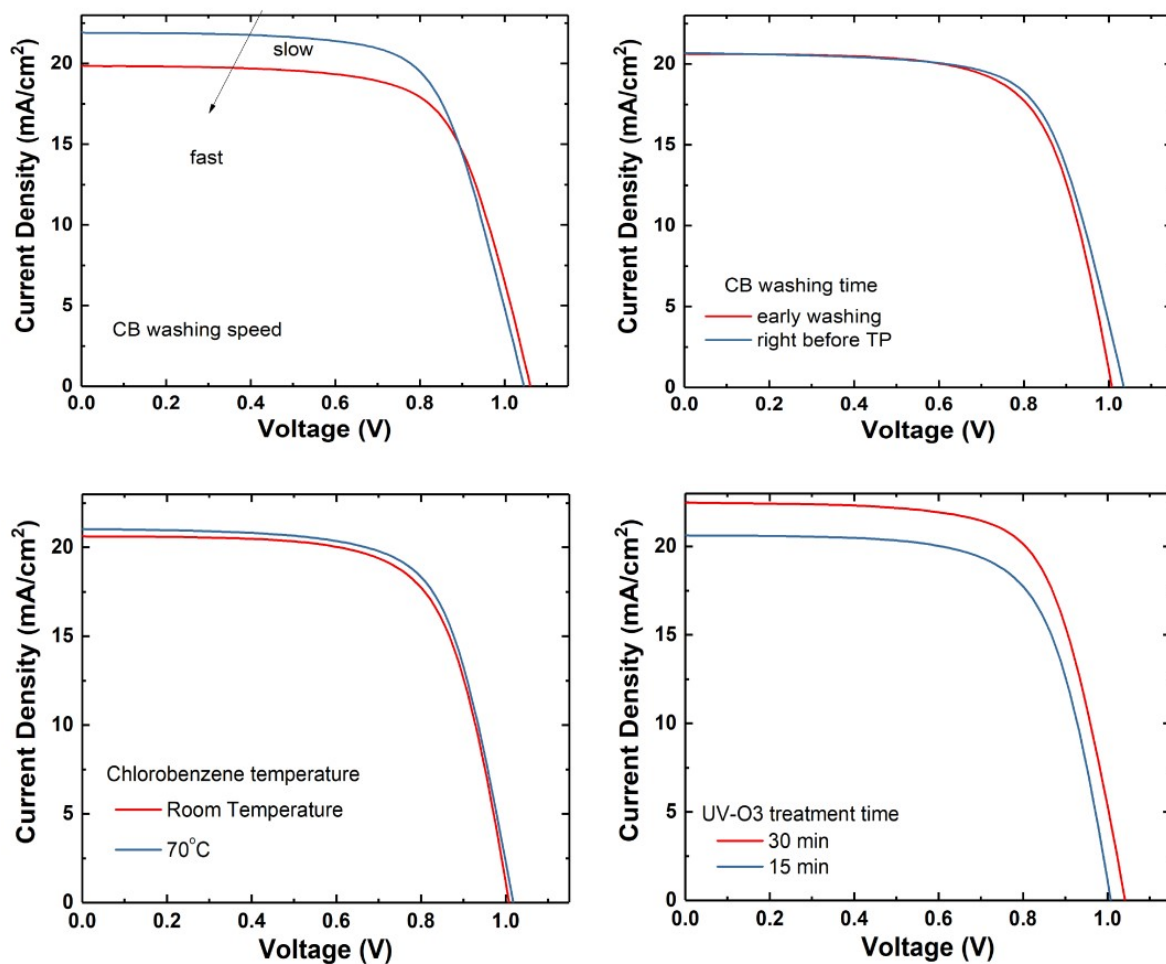

**Figure S7.** The effects of key deposition conditions, affecting the defect density of the fabricated  $(\text{CsI})_{0.17}(\text{FAI})_{0.83}(\text{PbI}_2)_{0.6}(\text{PbBr}_2)_{0.4}$  perovskite layers, in the resulting JV characteristics of the PSCs. In view of the optimization studies performed in this work, it was ascertained that chlorobenzene washing should be performed in a slow process, close to the end of the spinning (right before the turbid point) and a slight improvement has been observed when the antisolvent was applied after heating to 50-70°C. Additionally, increased UV-O<sub>3</sub> treatment time assists the perovskite coverage on the TiO<sub>2</sub> layer in high humid ambient which causes an increase in the solar cell performance.

**Table S1.** Specific fabrication parameters applied for the optimized WBG (1.70 eV) PSCs.

|                                | Antisolvent (CB) drip | UV-O <sub>3</sub> treatment on mesoporous TiO <sub>2</sub> | Substrate pretreatments |
|--------------------------------|-----------------------|------------------------------------------------------------|-------------------------|
| <b>Time</b>                    | 1-2 s before TP       | 30 minutes                                                 | 10 min                  |
| <b>Temperature</b>             | 50-70 °C              | Room temperature                                           | 70 °C                   |
| <b>Distance from substrate</b> | 5 mm                  | 2 cm                                                       | -                       |
| <b>Volume</b>                  | 80-120 μl             | -                                                          | -                       |

## References:

- [1] B. Chen, M. Yang, S. Priya, K. Zhu, Origin of J-V Hysteresis in Perovskite Solar Cells, *J. Phys. Chem. Lett.* 7 (2016) 905–917. <https://doi.org/10.1021/acs.jpcllett.6b00215>.
- [2] C. Li, S. Tscheuschner, F. Paulus, P.E. Hopkinson, J. Kießling, A. Köhler, Y. Vaynzof, S. Huettner, Iodine Migration and its Effect on Hysteresis in Perovskite Solar Cells, *Adv. Mater.* 28 (2016) 2446–2454. <https://doi.org/10.1002/adma.201503832>.
- [3] J. Bisquert, A. Guerrero, C. Gonzales, Theory of Hysteresis in Halide Perovskites by Integration of the Equivalent Circuit, *ACS Phys. Chem. Au.* (2021). <https://doi.org/10.1021/acspchemau.1c00009>.
- [4] S. Van Reenen, M. Kemerink, H.J. Snaith, Modeling Anomalous Hysteresis in Perovskite Solar Cells, *J. Phys. Chem. Lett.* 6 (2015) 3808–3814. <https://doi.org/10.1021/acs.jpcllett.5b01645>.
- [5] S.N. Habisreutinger, N.K. Noel, H.J. Snaith, Hysteresis Index: A Figure without Merit for Quantifying Hysteresis in Perovskite Solar Cells, *ACS Energy Lett.* 3 (2018) 2472–2476. <https://doi.org/10.1021/acsenergylett.8b01627>.
